# Supplementary material for: Single-Phase θ-Fe3C Derived from Prussian Blue and Its Catalytic Application in Fischer-Tropsch Synthesis
Source: MDPI journal article supplement (doi:10.3390/catal12101140), 2022-09-29
Supplement: s1 [file s1]

Supporting information

# Single-phase $\theta$ -Fe<sub>3</sub>C derived from Prussian blue and its catalytic application in Fischer-Tropsch synthesis

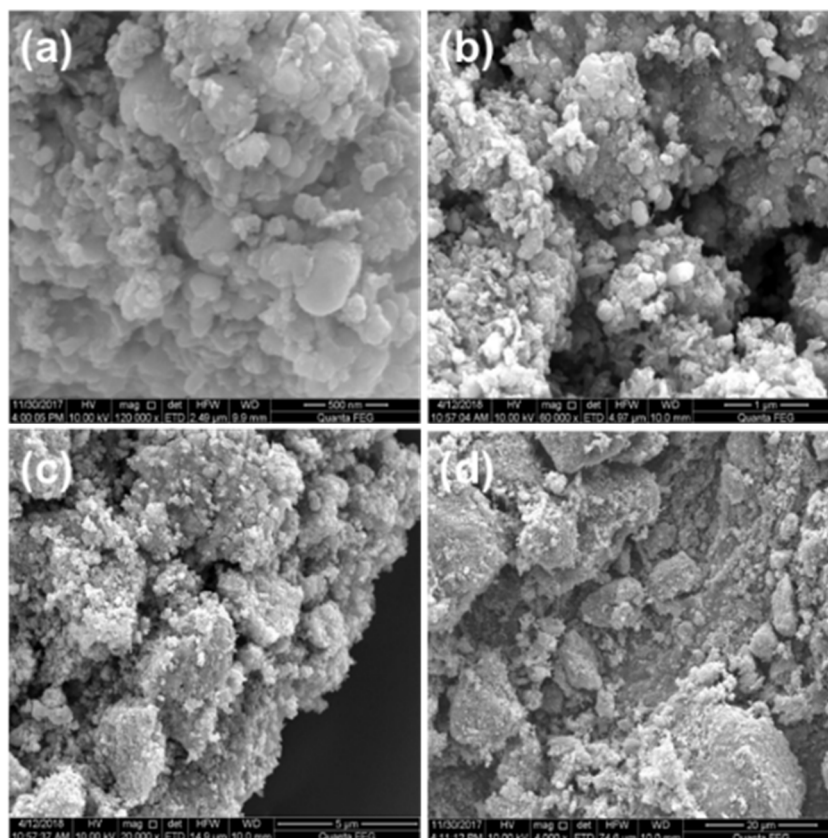

**Figure S1.** SEM images of the  $\theta$ -Fe<sub>3</sub>C sample.

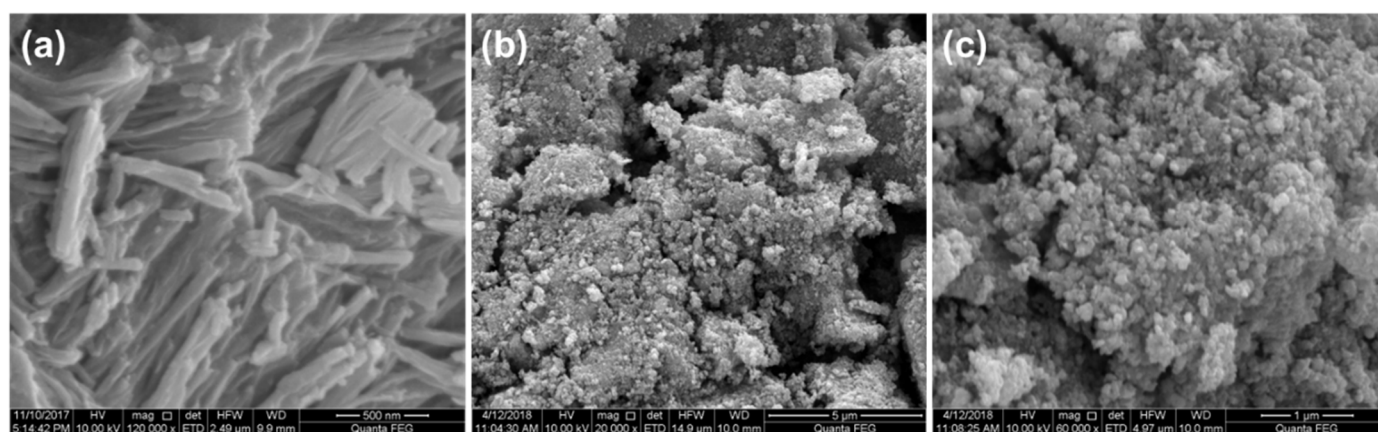

**Figure S2.** SEM images (a) precursor of 6 wt% Mn/Fe<sub>3</sub>C. (b, c) 6 wt% Mn/Fe<sub>3</sub>C sample.

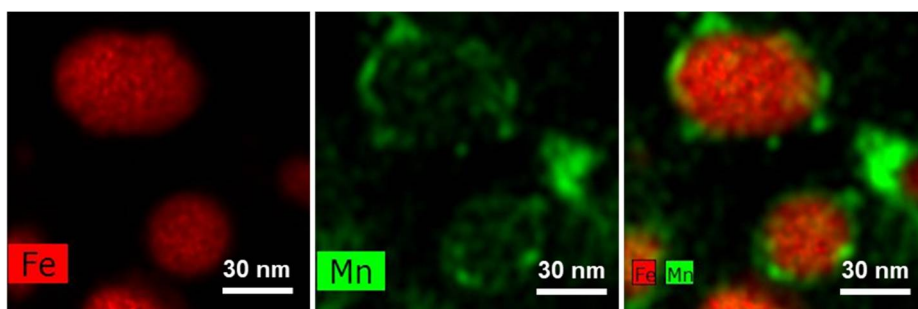

Figure S3. TEM elemental mapping images of 6 wt% Mn/Fe<sub>3</sub>C sample.

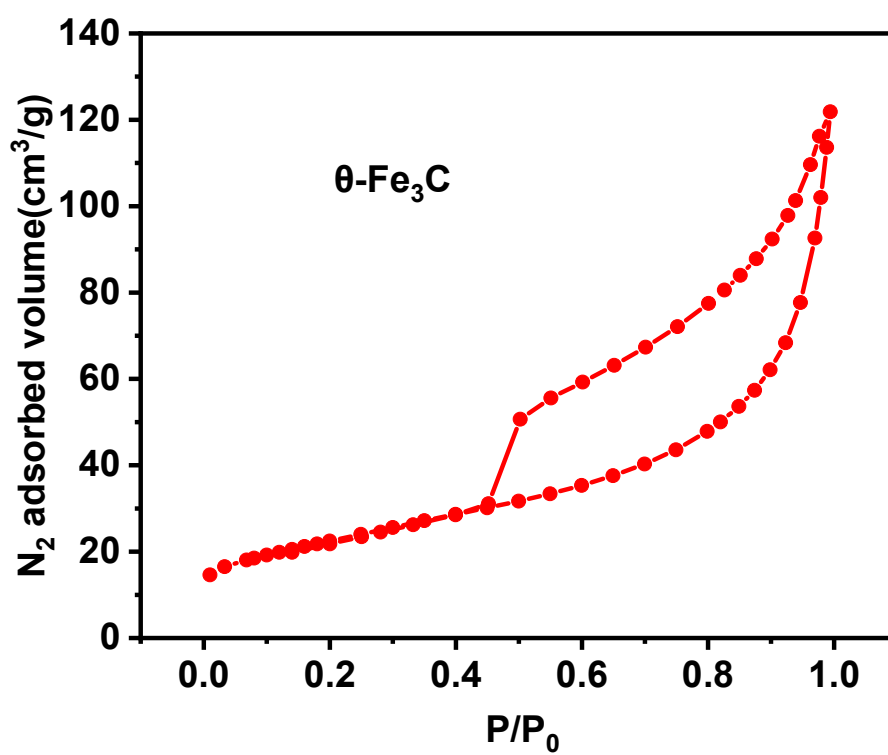

Figure S4. N<sub>2</sub> physisorption isotherm of  $\theta$ -Fe<sub>3</sub>C sample.

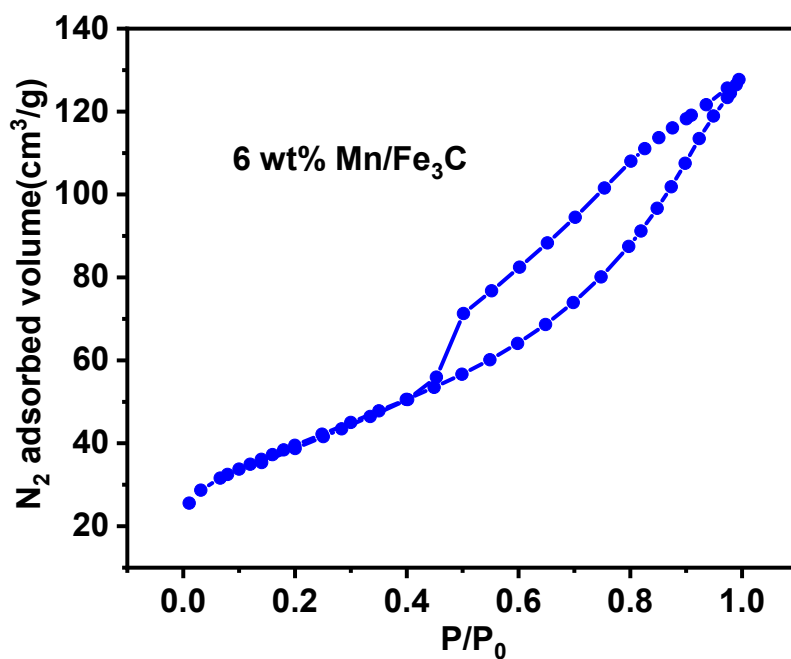

Figure S5. N<sub>2</sub> physisorption isotherm of 6 wt% Mn/Fe<sub>3</sub>C sample.

Table S1. Textural properties, crystallite size and manganese contents of samples.

| Samples                    | Mn/Fe (wt%) | BET surface area (m <sup>2</sup> /g) | Crystallite size <sup>1</sup> (nm) |
|----------------------------|-------------|--------------------------------------|------------------------------------|
| θ-Fe <sub>3</sub> C        | 0           | 81                                   | 32.3                               |
| 6 wt% Mn/Fe <sub>3</sub> C | 6.0         | 142                                  | 30.9                               |

<sup>1</sup> The crystallite size was estimated from the Scherrer equation.

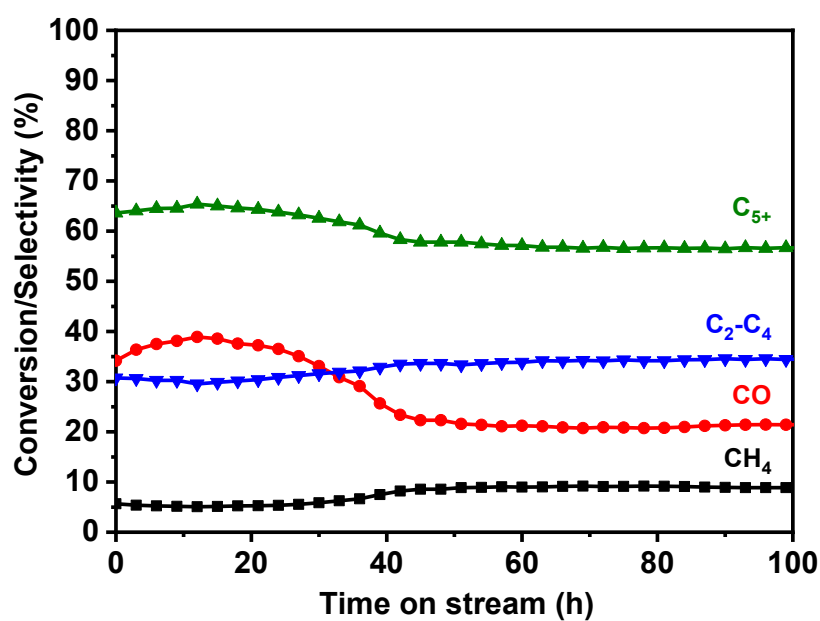

Figure S6. CO conversion and product selectivity of the 6 wt% Mn/Fe<sub>3</sub>C sample with the time on stream.
